# Supplementary material for: Isolation of cancer stem cells by selection for miR-302 expressing cells
Source: PeerJ. 2019 Mar 26;7:e6635. doi: 10.7717/peerj.6635 (PMC6440458; doi:10.7717/peerj.6635)
Supplement: Data S1 — Two independent and stem cells experienced persons scored the morphology of 29 micrographs taken from teratoma derived cells growing with and without G418 for 3 and 4 days. [file peerj-07-6635-s003.xlsx]

## Sheet: Sheet1
Micrographs	Treatments	Scores (max 2.5)	AVG	STDEV		Treatments	AVG	STDEV
1	day3 G+	1.17	1.684	0.433624		day3 G+	1.684	0.433624
2		2				day3 G-	0.832	0.372317
3		2				day4 G+	1.7975	0.41251
4		2				day4 G-	0.560909	0.4673
5		1.25
6	day3 G-	0.33	0.832	0.372317
7		0.83
8		1.33
9		0.67
10		1
11	day4 G+	1.8	1.7975	0.41251
12		2.5
13		1.33
14		1.17
15		2
16		1.75
17		1.83
18		2
19	day4 G-	1.5	0.560909	0.4673
20		0.67
21		1
22		1
23		0.17
24		0.67
25		0.33
26		0.33
27		0.5
28		0
29		0
Stemness state scoring of the teratoma derived cells seeding with and without G418 (score 2.5 is the max for stem cell state and zero is fully differentiated)
Each score is an average of two scores given to each micrograph by two experienced persons separatel
