# Supplementary material for: Isolation of cancer stem cells by selection for miR-302 expressing cells
Source: PeerJ journal article supplement (doi:10.7717/peerj.6635), 2019-03-26
Supplement: Isolation_of_cancer_stem_cells_by_selection_for_miR-302_expressing_cells_-_Supplementary_file.pdf [file Isolation_of_cancer_stem_cells_by_selection_for_miR-302_expressing_cells_-_Supplementary_file.pdf]

## Isolation of cancer stem cells by selection for miR-302 expressing cells

### Supplementary data:

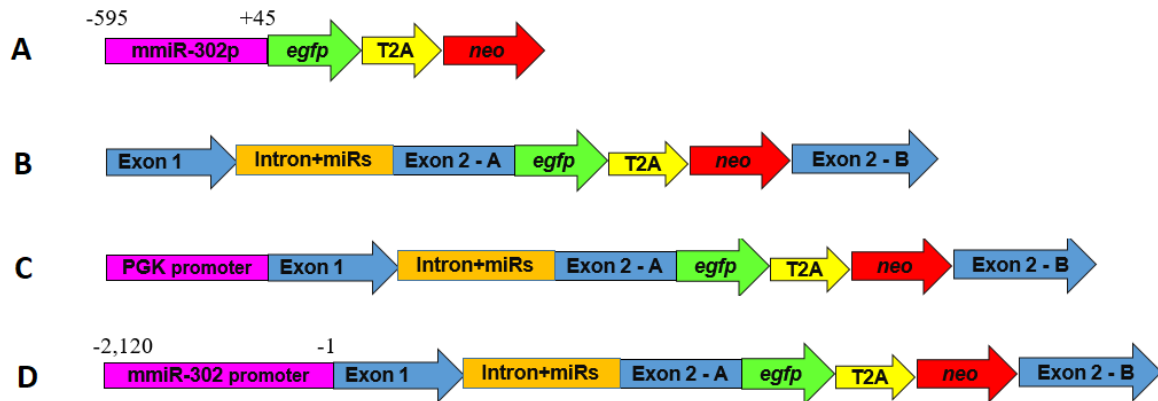

Figure S1: An overview of the constructs designed and used in the project. A) Map of pmmiR302pEGFP-NEO vector, *egfp-neo* is expressed by the core promoter element of murine *miR-302*. B) Map of pmmiR302hostGFP-NEO vector. C) Map of pPGKmm302hostGFP-NEO, *egfp-neo* is expressed by the PGK promoter. D) Map of pmmiR302phostGFP-NEO, *egfp-neo* is expressed by the extended 2.1 kb murine *miR-302* promoter.

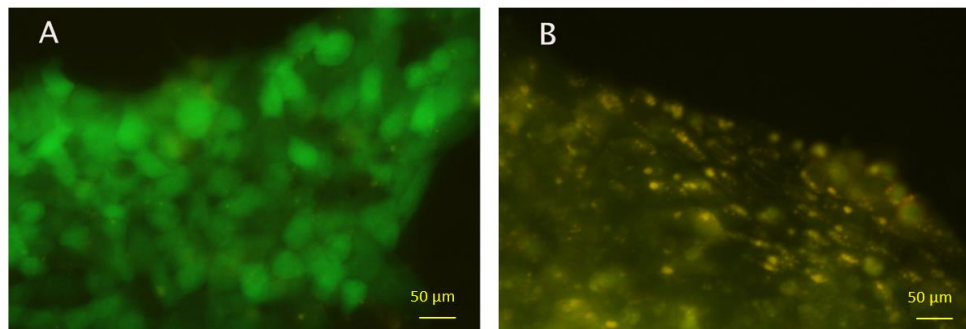

Figure S2: Undifferentiated cells (A), grown for five days on feeder cells with complete ES cell medium containing LIF, showed expression of EGFP under the control of 600 bp *mmiR-302* upstream regulatory sequences. The same clone grown on gelatin with standard fibroblast medium not containing LIF did not show a significant EGFP signal after five days (B).

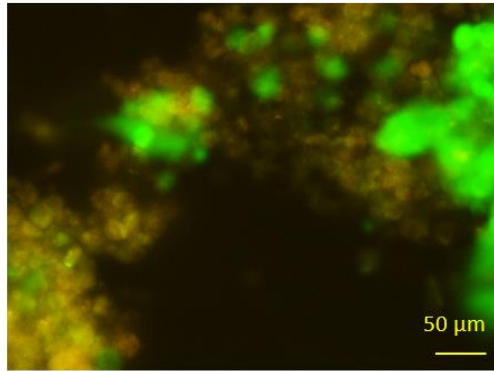

Figure S3: Reappearing EGFP expression after five days of culture under differentiation condition. The distribution of the EGFP signal suggests a reappearing of undifferentiated cells.

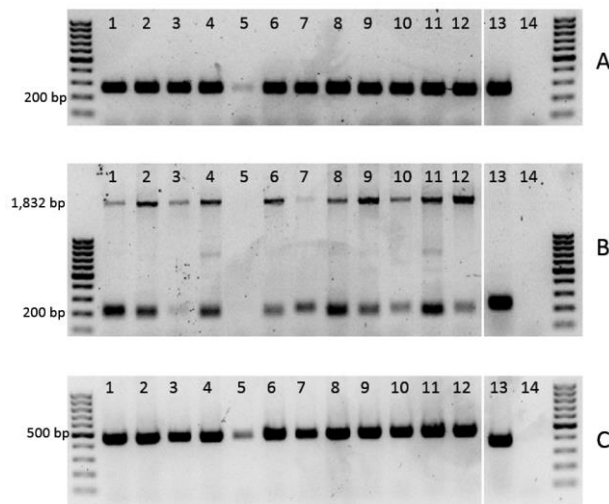

Figure S4: RT-PCR analysis of 12 clones stably transfected with pPGKmmiR302KIGFP-NEO. Lanes 1-12: G418 resistant clone, lane 13: Positive control cDNA from a teratoma, lane 14 is a negative control w/o template cDNA. (A) RT-PCR for *Hprt* as an internal control, the expected band size is 266 bp. (B) RT-PCR using primers in both exons 1 and 2 spanning the *egfp-neo* transgene sequence, the expected band size for the endogenous *mmiR-302* host RNA is 221 bp and 1,832 bp for the transcript contained *egfp-neo* after proper splicing; (C) transgene specific RT-PCR using primers for exon 1 and *egfp*, the expected band size after splicing is 457 bp, but 358 bp for the positive control shown in lane 13.

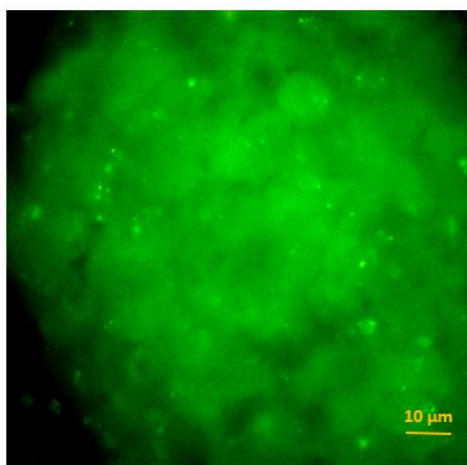

Figure S5: EGFP signal in pPGKmmiR302KIGFP-NEO transfected ES cells.

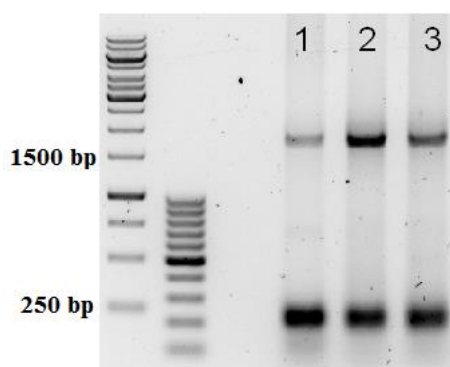

Figure S6: RT-PCR analysis using equal amounts of cDNA from teratoma derived cells under different selection conditions. Lane 1: Primary selected cells (see figure 3); lane 2: Cells stably growing in ES cell medium under the G418 selection; lane 3: Selected cells four days growing in ES cell medium without G418 selection. RT-PCR using primers in both exons 1 and 2 spanning the *egfp-neo* transgene sequence, the expected band size for the endogenous *mmiR-302* host RNA is 221 bp and 1,832 bp for the transgene transcript contained *egfp-neo* after correct splicing.

|                        | Undifferentiated (118 Colonies) |            |            | Differentiated (100 Colonies) |          |          |
|------------------------|---------------------------------|------------|------------|-------------------------------|----------|----------|
| Relative EGFP signal   | +                               | +/-        | -          | +                             | +/-      | -        |
| Number of colonies (%) | 12 (10.2%)                      | 81 (68.6%) | 25 (21.2%) | 2 (2%)                        | 33 (33%) | 65 (65%) |

Table S1: From 228 randomly picked primary colonies, 118 colonies grew well enough under ES cell culture condition to be scored. 10.2% of those colonies were completely green, 68.8% showed weak or inhomogeneous EGFP signal and 21.2% were EGFP negative. Under differentiation condition, 100 colonies grew well enough to be scored. Of these only 2% were completely green, 33% showed weak or inhomogeneous EGFP signal and 65% were EGFP negative.

### Programs for PCRs and some primer sequences which not mentioned in the text:

All common PCRs were done using this program unless otherwise mentioned:

94 °C 5 min, (94 °C 1 min, 58 °C 45 sec, 72 °C 1 min/kb) X 35, 72 °C 7 min

#### *mmiR-302* spliced host RNA RT-PCR:

94 °C 5 min, (94 °C 1 min, 56 °C 1 min, 72 °C 1 min) X 35, 72 °C 7 min

Forward primer: 5' AGAACAGGACTCTTTGGGAG

Reverse primer: 5' GCTCCCCAAAATGTTACTCA

#### *Egfp* and *egfp-neo* RT-PCR:

95 °C 10 min, (95 °C 30 sec, 56 °C 30 sec, 72 °C 30) X 35, 72 °C 7 min

Forward primer for *egfp*: 5' GCGCACCATCTTCTTCAA

Reverse primer for *egfp*: 5' CTTCTCGTTGGGGTCTTT

Forward primer for *egfp-neo*: 5' GGCCGACAAGCAGAAGAA

Reverse primer for *egfp-neo*: 5' CTTGACAAAAGAACCGGG

#### Exon1-*egfp* specific RT-PCR:

95 °C 10 min, (95 °C 45 sec, 53 °C 1 min, 72 °C 1 min) X 35, 72 °C 7 min

Forward primer: 5' AGAACAGGACTCTTTGGGAG

Reverse primer: 5' GTCCTTGAAGAAGATGGT

***Hprt* RT-PCR:**

94 °C 5 min, (94 °C 45 sec, 60 °C 45 sec, 72 °C 1 min) X 30, 72 °C 7 min

Forward primer: 5' GCAAGCTTGCTGGTGAAAAGGA

Reverse primer: 5' GCAGAUGGCCACAGGACUAGAACA

**Long PCR amplification of the first and second part of the gene:**

95 °C 10 min, (95 °C 1 min, 55 °C 1 min, 72 °C 2 min) X 35, 72 °C 7 min

Primer's sequences are shown in the text.
